# Supplementary material for: Oxygen-Releasing Hyaluronic Acid-Based Dispersion with Controlled Oxygen Delivery for Enhanced Periodontal Tissue Engineering
Source: MDPI journal article supplement (doi:10.3390/ijms24065936), 2023-03-21
Supplement: s1 [file s1]

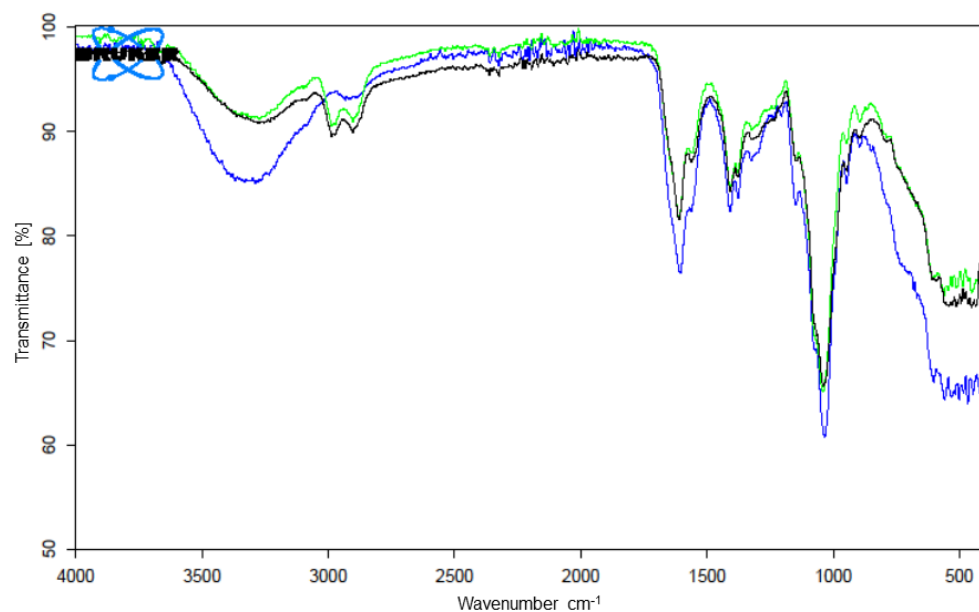

**Figure S1.** Comparison of IR spectra of freshly prepared mixture of PBS, HA and CaO<sub>2</sub> in water (black) against a sample that was stored under exclusion of ambient light for two months (green) and seven months (blue).
